# Supplementary material
Source: PubMed Central journal article supplement (PMC8092534)
Supplement: AAC.00858-20-s001.pdf [file AAC.00858-20-s001.pdf]

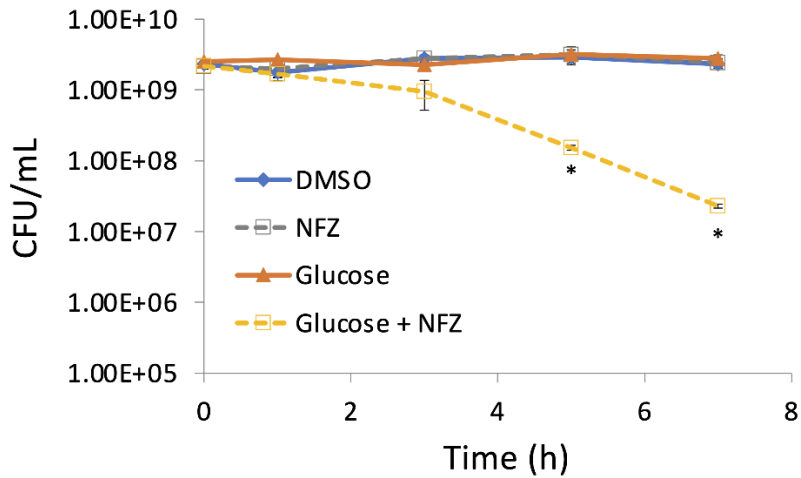

**Supplementary Figure 1. Glucose-mediated re-sensitization of non-growing *E. coli* to nitrofurazone.** Overnight cultures were treated with 250  $\mu\text{g}/\text{mL}$  NFZ, 10 mM glucose, NFZ supplemented with glucose or DMSO (solvent for NFZ). CFUs per mL were monitored at the indicated time points. \*  $p < 0.05$  (t-test), comparing NFZ with NFZ + glucose. Data represent at least three biological replicates. Each data point was denoted as mean  $\pm$  s.e.

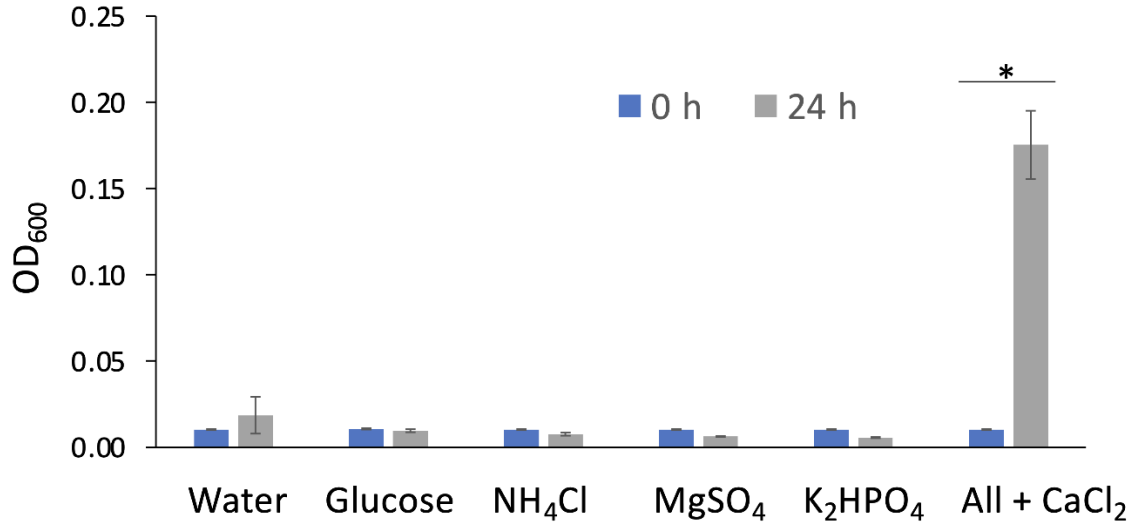

**Supplementary Figure 2. Confirmation of non-growing conditions.** Stationary-phase cultures in MOPS + glucose were washed with saline, diluted to  $OD_{600} \sim 0.01$  in saline and further incubated for 1 h before addition of water, 10 mM glucose, 9.5 mM  $NH_4Cl$ , 0.286 mM  $MgSO_4$ , or 1.32 mM  $K_2HPO_4$ . One test tube received all the chemicals plus 0.1 mM  $CaCl_2$  (growth control). Following treatments, cultures were incubated for 23 h.  $OD_{600}$  was determined immediately after dilution and 24 h after treatments. \*  $p < 0.05$  (t-test), comparing 0 with 24 h. Data represent at least three biological replicates. Each data point was denoted as mean  $\pm$  s.e.

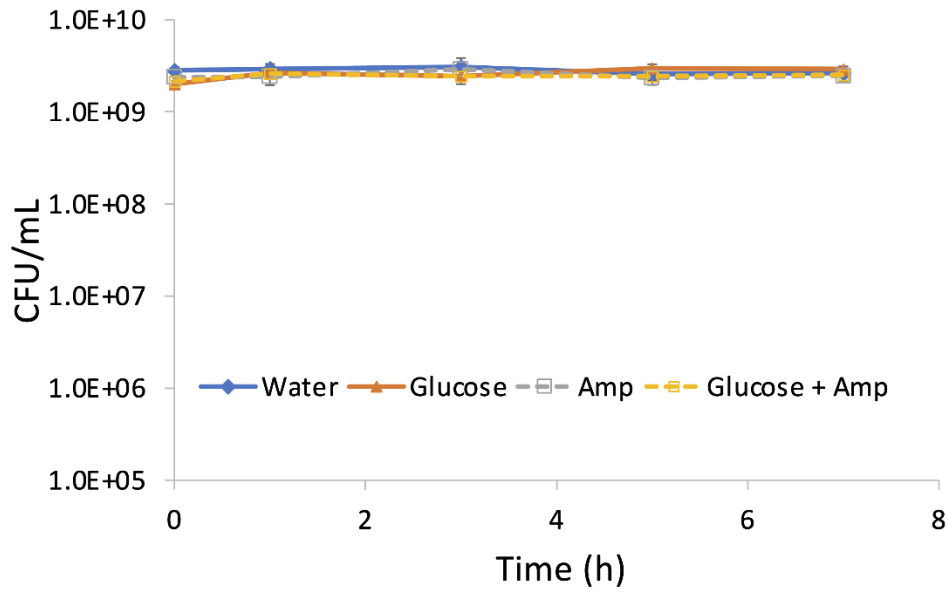

**Supplementary Figure 3. Ampicillin challenge assay.** Cultures of *E. coli* were grown to stationary phase in MOPS + glucose and treated with water (control), 200  $\mu\text{g}/\text{mL}$  ampicillin, 10 mM glucose, or ampicillin plus glucose. CFUs per mL were determined at the indicated time points. No significant killing was observed by ampicillin treatment with or without glucose supplementation when compared with the water-treated control. Data represent at least three biological replicates. Each data point was denoted as mean  $\pm$  s.e.

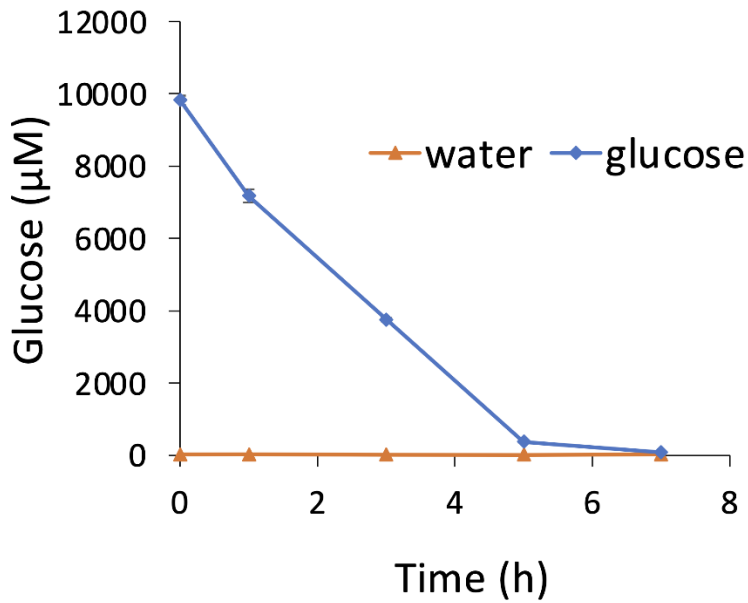

**Supplementary Figure 4. Glucose consumption by wild-type *E. coli*.** Overnight cultures were treated with glucose or water. Supernatant was collected for determination of glucose concentration immediately after addition of glucose or water and after 1, 3, 5, and 7 h of incubation. Data represent at least three biological replicates. Each data point was denoted as mean  $\pm$  s.e.

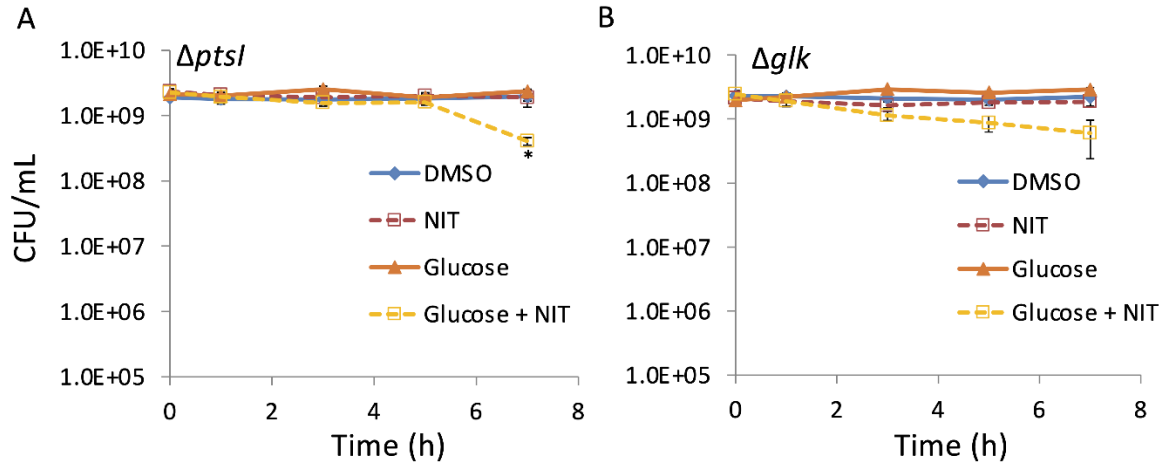

**Supplementary Figure 5. Assessment of glucose-mediated NIT re-sensitization in  $\Delta ptsI$  and  $\Delta glk$ .** Stationary-phase cultures of  $\Delta ptsI$  (A) or  $\Delta glk$  (B) were treated with DMSO, 250  $\mu\text{g}/\text{mL}$  NIT, 10 mM glucose or NIT supplemented with glucose for 7 h. At the indicated time points aliquots were taken for CFUs per mL determination. \*  $p < 0.05$  (t-test), comparing NIT versus Glucose + NIT at  $t = 7$  h. Data represent at least three biological replicates. Each data point was denoted as mean  $\pm$  s.e.

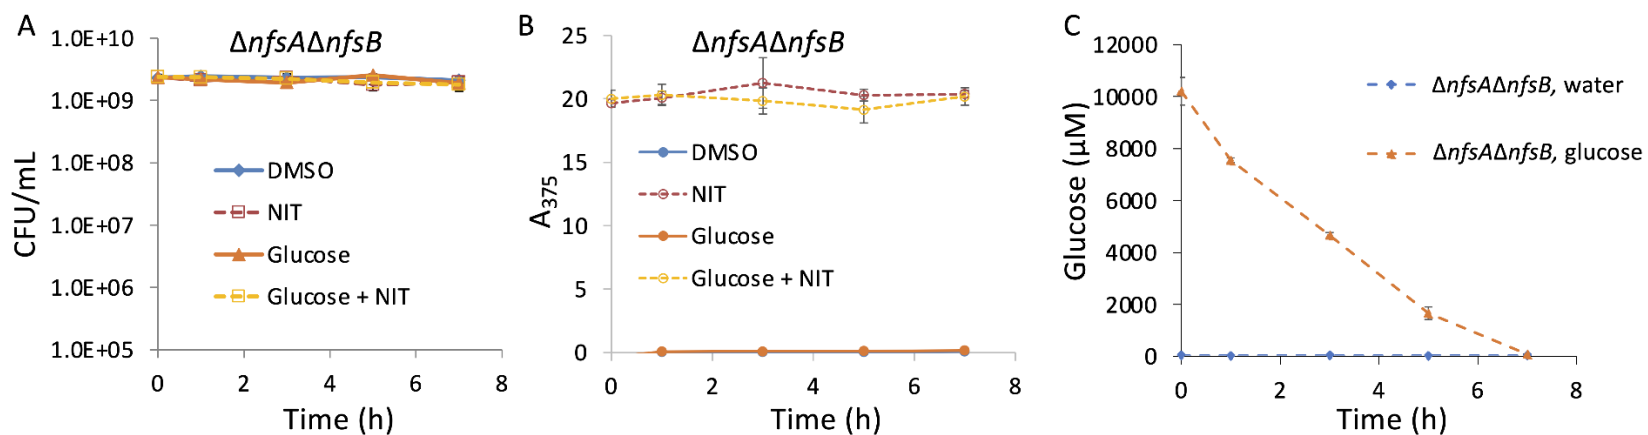

**Supplementary Figure 6. NIT activation requires NfsA and NfsB during non-growing conditions.** An *E. coli* strain where *nfsA* and *nfsB* had been deleted ( $\Delta nfsA\Delta nfsB$ ) was grown to stationary phase and treated with DMSO, 250  $\mu\text{g}/\text{mL}$  NIT, 10 mM glucose or NIT supplemented with glucose for 7 h. At the indicated time points aliquots of the cultures were taken for CFUs per mL determination (A), absorbance measurements at 375 nm (B), or glucose concentration measurements (C). Data represent at least three biological replicates. Each data point was denoted as mean  $\pm$  s.e.

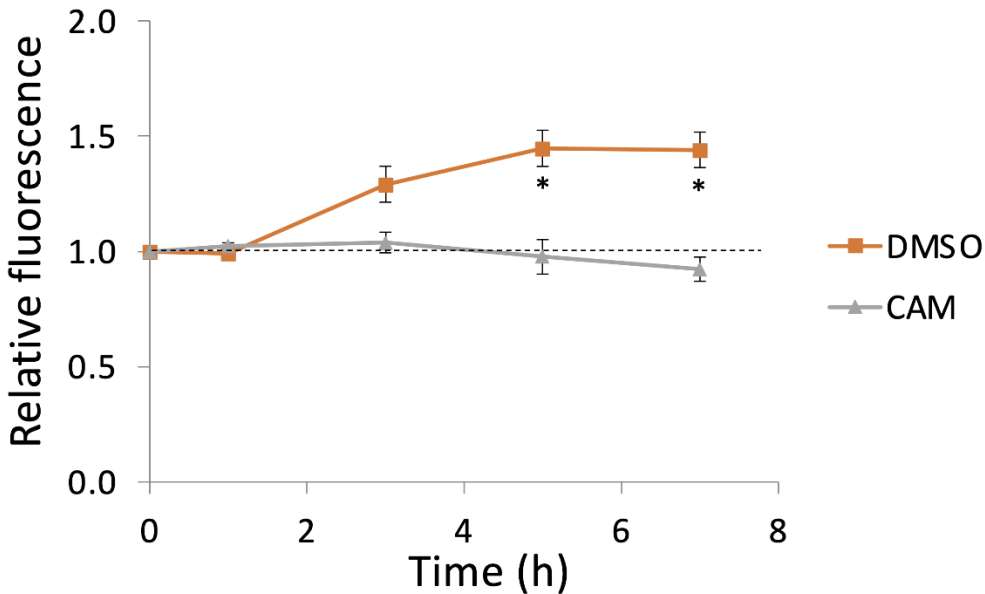

**Supplementary Figure 7. Determination of experimental conditions for inhibition of**

**protein synthesis during stationary phase.** A culture of wild-type *E. coli* strain carrying pQE-80L-*gfp* (IPTG-inducible GFP) was grown to stationary phase for 19 h ( $t = 19$  h). At  $t = 19$  h, DMSO (solvent for CAM) or 100  $\mu\text{g}/\text{mL}$  CAM was added, and cultures further incubated for 1 h. At  $t = 20$  h, 1 mM IPTG was added to both cultures. Green fluorescence was monitored at the indicated time points. Data are presented relative to the green fluorescence signal at the time of IPTG addition ( $t = 0$ ). \*  $p < 0.05$  (t-test), comparing values to that of 1, which represents the absence of change with respect to the initial time point. Data represent at least three biological replicates. Each data point was denoted as mean  $\pm$  s.e.

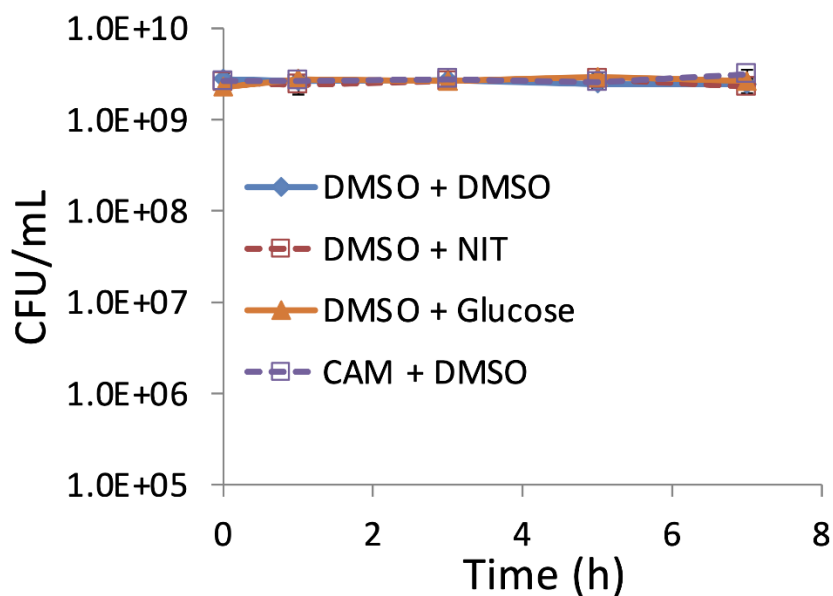

**Supplementary Figure 8. Pre-treatment with DMSO does not impact NIT or glucose**

**treatments.** Stationary-phase cultures of *E. coli* were treated with DMSO (solvent for CAM) or CAM and incubated for 1 hour. After 1 h incubation, cultures were treated with DMSO (solvent for NIT), 250  $\mu\text{g/mL}$  NIT or 10 mM glucose. CFUs per mL were determined at the indicated time points. Data represent at least three biological replicates. Each data point was denoted as mean  $\pm$  s.e.



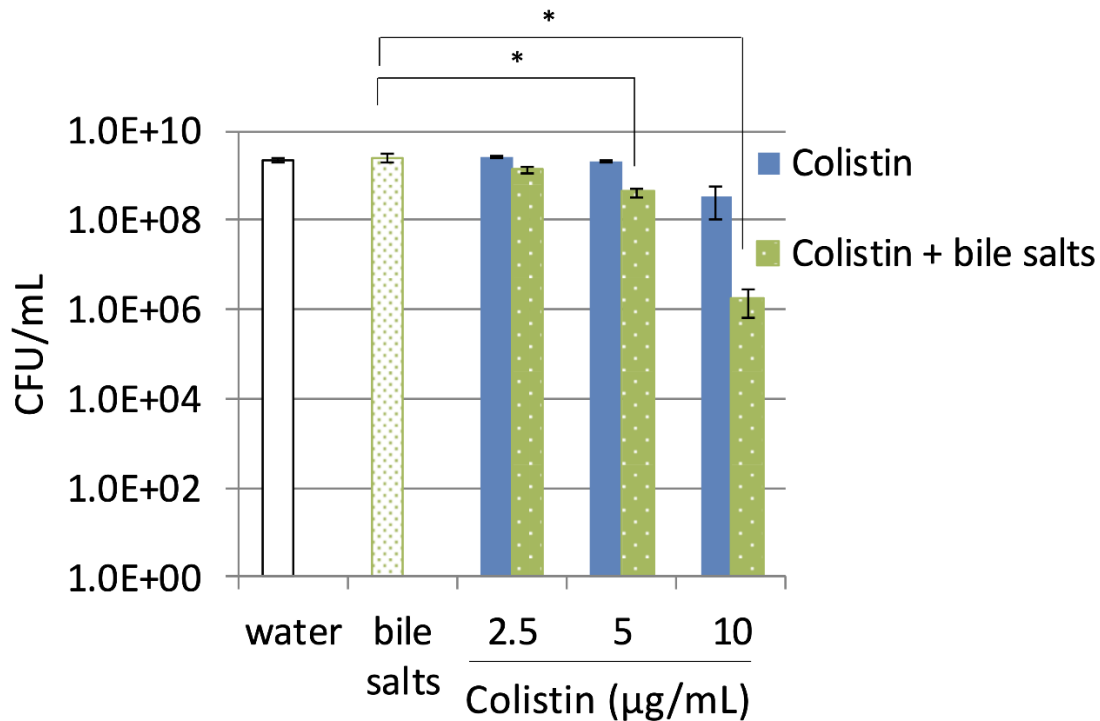

**Supplementary Figure 9. Determination of colistin concentration necessary to permeate**

**stationary-phase *E. coli* membranes.** Stationary-phase cultures of *E. coli* were divided into

eight test tubes before treatment with water, 1.5 mg/mL bile salts, or different concentrations of

colistin (2.5, 5, and 10 µg/mL) in the absence or presence of 1.5 mg/mL bile salts. Cultures were

incubated for 7 h. At  $t = 7$  h, samples were processed to measure CFUs per mL and plated onto

LB agar plates. \*  $p < 0.05$  (t-test), comparing bile salts with colistin + bile salts. Data represent at

least three biological replicates. Each data point was denoted as mean  $\pm$  s.e.

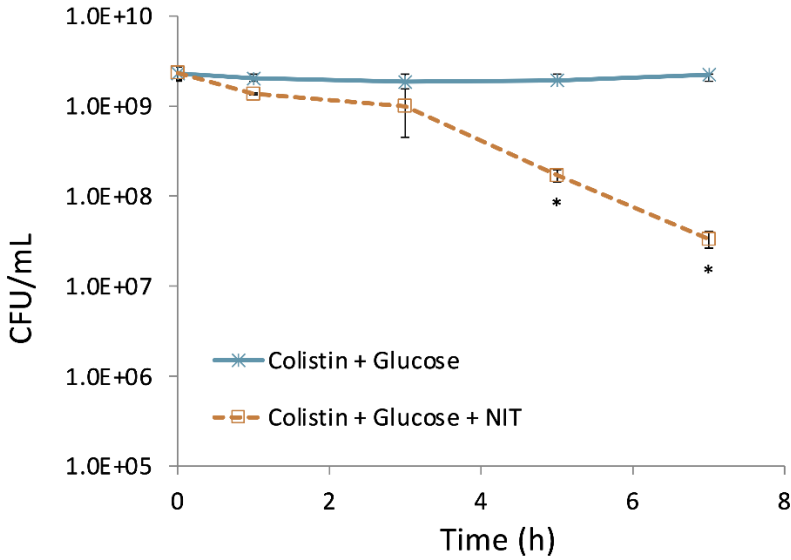

**Supplementary Figure 10. Additional controls for membrane permeabilization**

**experiments.** Stationary-phase cultures of *E. coli* were grown the same way as described for Figure 6A and treated with 5  $\mu\text{g}/\text{mL}$  colistin plus glucose or colistin plus glucose and NIT. \*  $p < 0.05$  (t-test), comparing Colistin + Glucose with Colistin + Glucose + NIT. Data represent at least three biological replicates. Each data point was denoted as mean  $\pm$  s.e.

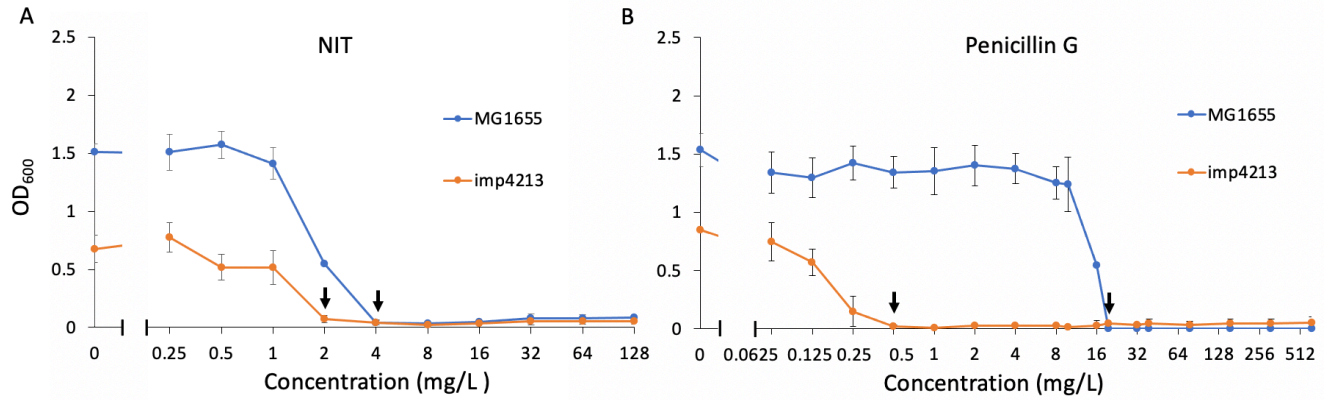

**Supplementary Figure 11. Minimum inhibitory concentrations of *imp4213* and MG1655**

**strains.** MICs were determined by the microdilution method as described in the Materials and Methods. Optical density (OD<sub>600</sub>) measurements were carried out after incubation for 16-18 h with NIT or penicillin G. MICs are indicated (arrowhead). Data represent at least three biological replicates. Each data point was denoted as mean  $\pm$  s.e.

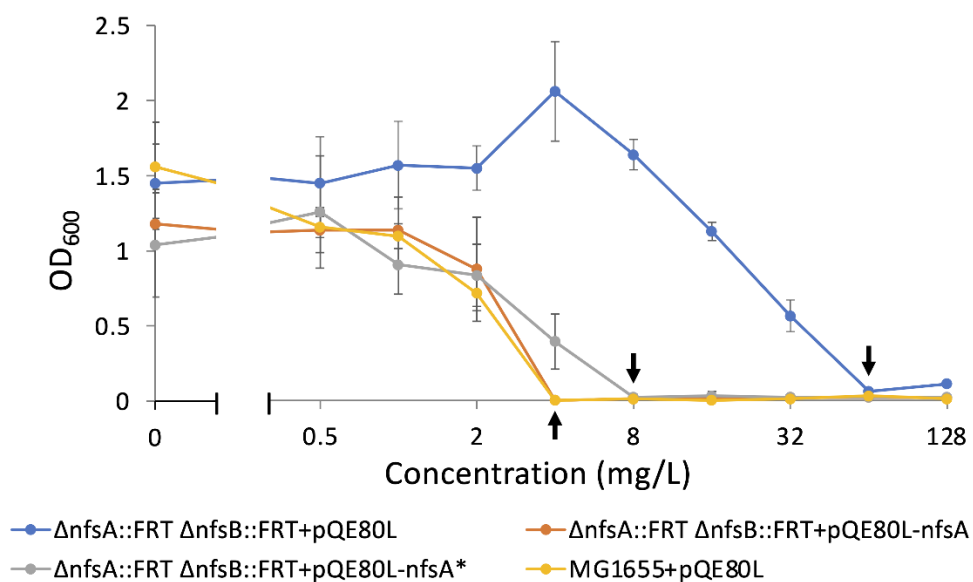

**Supplementary Figure 12. Minimum inhibitory concentrations of  $\Delta nfsA\Delta nfsB$  strains expressing NfsA, NfsA\*, or empty vector.** MICs were determined by the microdilution method as described in the Materials and Methods. Optical density ( $OD_{600}$ ) measurements were carried out after incubation for 16-18 h with NIT. MICs are indicated (arrowhead). Data represent at least three biological replicates. Each data point was denoted as mean  $\pm$  s.e.

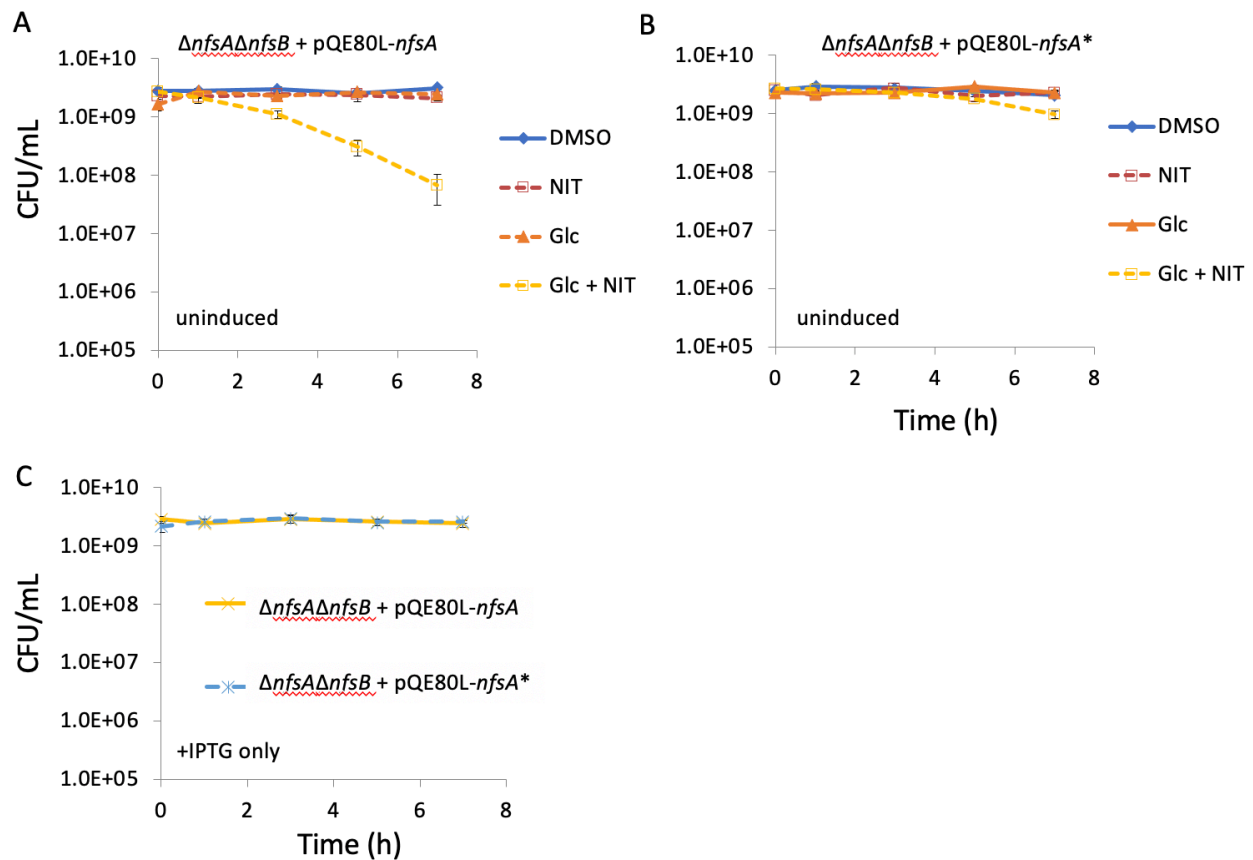

**Supplementary Figure 13. Controls for NfsA and NfsA\* expression experiments.** Stationary-phase cultures of  $\Delta nfsA\Delta nfsB$  carrying either wild-type NfsA (pQE-80L-*nfsA*) (A) or a mutant NfsA protein (pQE-80L-*nfsA*\*) with decreased NAPDH binding affinity (B) were treated with DMSO, 250  $\mu$ g/mL NIT, 10 mM glucose, or NIT supplemented with glucose. In (C), stationary-phase cultures of  $\Delta nfsA\Delta nfsB$  carrying either pQE-80L-*nfsA* or pQE-80L-*nfsA*\* were treated with 1 mM IPTG. CFUs per mL were determined at the indicated time points. Data represent at least three biological replicates. Each data point was denoted as mean  $\pm$  s.e.

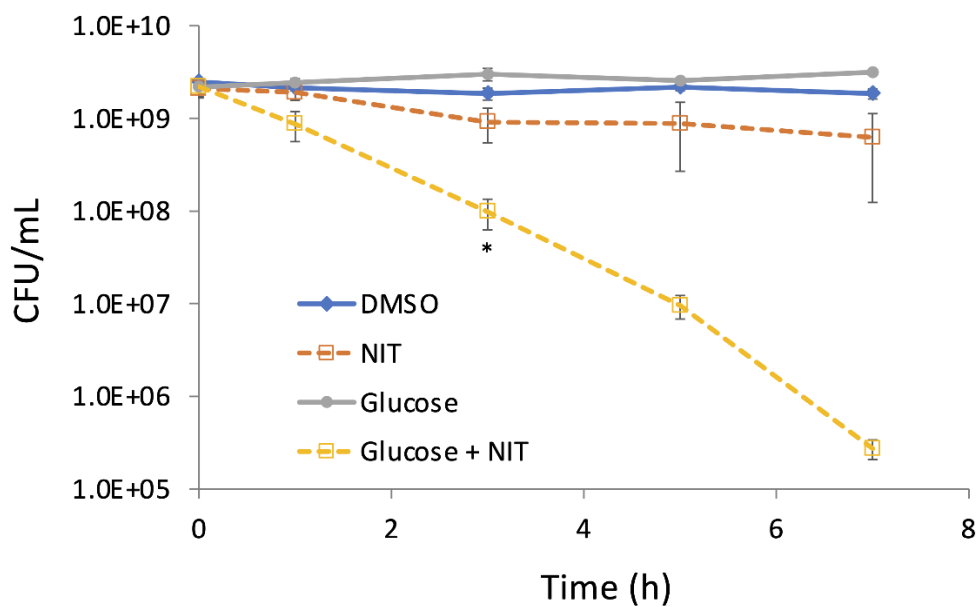

**Supplementary Figure 14. Metabolite-mediated potentiation of NIT with stationary-phase cultures grown in LB for 24h.** Stationary-phase cultures of *E. coli* were grown in LB for 24h and treated with DMSO, 250  $\mu\text{g}/\text{mL}$  NIT, 10 mM glucose with or without NIT. CFUs per mL were monitored at indicated time points. \*  $p < 0.05$  (t-test), comparing NIT with Glucose + NIT. Data represent at least three biological replicates. Each data point was denoted as mean  $\pm$  s.e.

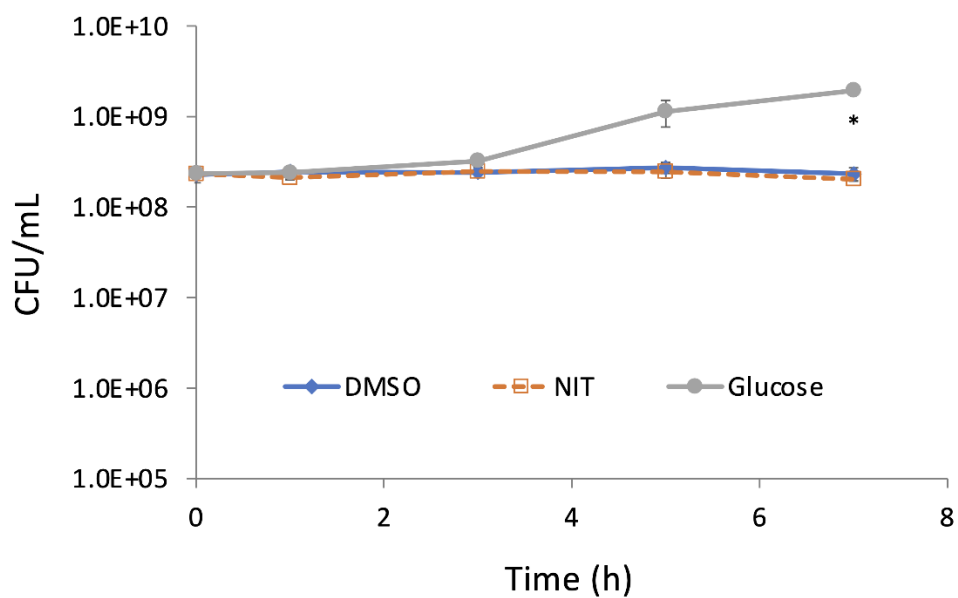

**Supplementary Figure 15. Stationary-phase cultures grown in AUM treated with 10 mM glucose resulted in growth.** Cultures of *E. coli* were grown to stationary phase in AUM and treated with DMSO, 250  $\mu\text{g}/\text{mL}$  NIT, or 10 mM glucose. CFUs per mL were monitored at indicated time points. \*  $p < 0.05$  (t-test), comparing DMSO with Glucose. Data represent at least three biological replicates. Each data point was denoted as mean  $\pm$  s.e.

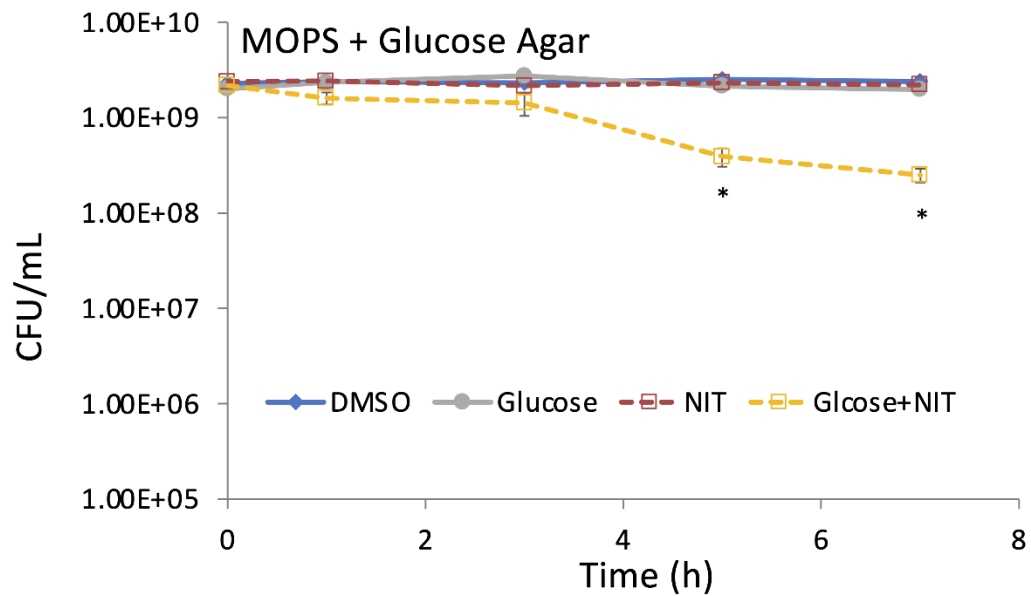

**Supplementary Figure 16. Re-sensitization of non-growing *E. coli* to NIT evaluated on MOPS + glucose agar plates.** Stationary-phase cultures were processed identically as in Figure 2 except plating was on MOPS + glucose agar, rather than LB + agar. \*  $p < 0.05$  (t-test), comparing NIT with Glucose + NIT.



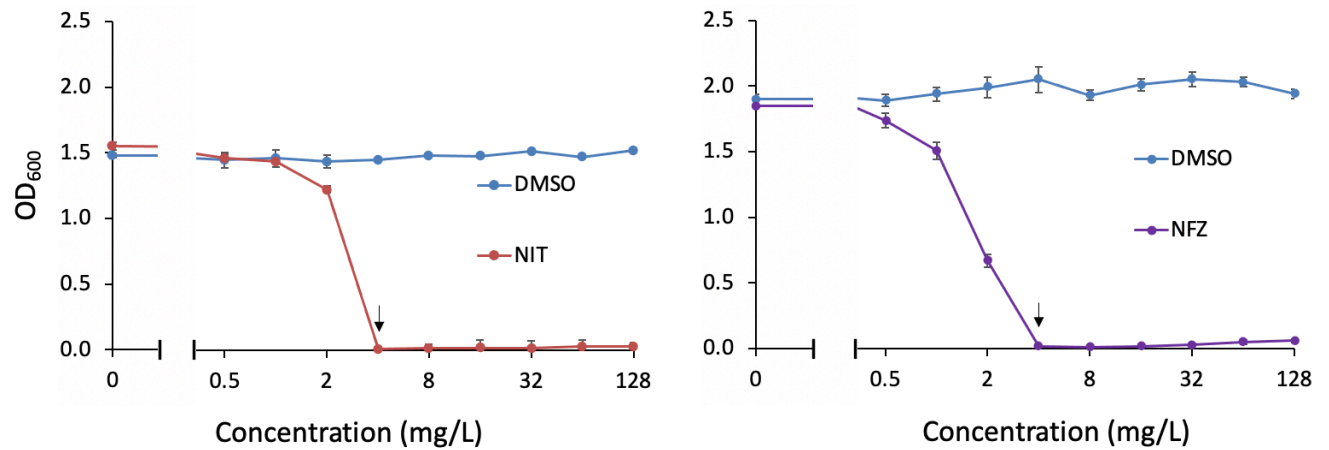

**Supplementary Figure 17. Minimum inhibitory concentrations of NIT and NFZ.** MICs were determined by the microdilution method. Optical density (OD<sub>600</sub>) measurements were carried out after incubation for 16-18 h with NIT, NFZ, or DMSO, the solvent for NIT and NFZ. MICs are indicated (arrowhead). For a definition of the MIC, see Materials and Methods. Data represent at least three biological replicates. Each data point was denoted as mean  $\pm$  s.e.

**Supplementary Table 1. Bacterial strains and plasmids**

| <b>Strain</b>                     | <b>Relevant genotype</b>                                  | <b>Source</b>                                                                                                                                                                                                                |
|-----------------------------------|-----------------------------------------------------------|------------------------------------------------------------------------------------------------------------------------------------------------------------------------------------------------------------------------------|
| MG1655                            | F-, λ-, <i>ilvG</i> -, <i>rfb-50</i> , <i>rph-1</i>       | ATCC 700926 (1)                                                                                                                                                                                                              |
| MG1655Δ <i>ptsI</i>               | Δ <i>ptsI</i> ::FRT                                       | P1 transduction of Keio mutant (2), followed by curing of the kanamycin resistance cassette                                                                                                                                  |
| MG1655Δ <i>ptsI</i> Δ <i>glk</i>  | Δ <i>ptsI</i> ::FRTΔ <i>glk</i> ::kan                     | PCR-based (3) <i>glk</i> inactivation in MG1655Δ <i>ptsI</i>                                                                                                                                                                 |
| MG1655Δ <i>glk</i>                | Δ <i>glk</i> ::kan                                        | P1 transduction of Keio mutant (2)                                                                                                                                                                                           |
| MG1655Δ <i>nfsA</i> Δ <i>nfsB</i> | Δ <i>nfsA</i> ::FRTΔ <i>nfsB</i> ::FRT                    | Sequential P1 transduction of Keio mutants (2) with step-wise curing of the kanamycin resistance cassette                                                                                                                    |
| CFT073 [WAM2267]                  | Genome sequenced strain. GenBank: AE014075.1              | ATCC 700928. <i>rpoS</i> was sequenced and as indicated in the Genbank sequence, a 5 bp duplication of GTAGA starting at nucleotide 432 of the open reading frame was detected, which produced a frame-shift in the protein. |
| UTI89                             | UPEC, cystitis isolate (O18:K1:H7)<br>GenBank: CP000243.1 | (4, 5)                                                                                                                                                                                                                       |
| <i>imp4213</i>                    | MG1655, <i>lptD4213</i>                                   | (6)                                                                                                                                                                                                                          |
| <b>Plasmid</b>                    | <b>Description</b>                                        | <b>Source</b>                                                                                                                                                                                                                |
| pQE-80L-kan                       | pQE-80L variant conferring kanamycin resistance           | (7)                                                                                                                                                                                                                          |
| pQE-80L- <i>gfp</i>               | <i>gfp</i> in pQE-80L-kan                                 | (7)                                                                                                                                                                                                                          |
| pCP20                             | pCP20, repA101(ts), Amp <sup>R</sup> and CAM <sup>R</sup> | (3)                                                                                                                                                                                                                          |
| pQE-80L                           | pQE-80L, Amp <sup>R</sup>                                 | Qiagen                                                                                                                                                                                                                       |
| pQE-80L- <i>nfsA</i>              | NfsA cloned into pQE-80L                                  | This study                                                                                                                                                                                                                   |
| pQE-80L- <i>nfsA</i> *            | NfsA* (R203A) cloned into pQE-80L                         | This study                                                                                                                                                                                                                   |

**Supplementary Table 2. DNA oligonucleotides**

| <b>Primers used to generate <i>nfsA</i> and <i>nfsA</i>* expression plasmids</b> |                                                |                                                                                                                                   |
|----------------------------------------------------------------------------------|------------------------------------------------|-----------------------------------------------------------------------------------------------------------------------------------|
| <b>Primer name</b>                                                               | <b>Sequence</b>                                | <b>Description</b>                                                                                                                |
| nfsA_EcoRI                                                                       | GCGCGGGAATTCCACGTT<br>AGAAAGAGAAAAAGATAA<br>TG | Used in conjunction with nfsA_HindIII to clone <i>nfsA</i> into pQE-80L                                                           |
| nfsA_HindIII                                                                     | GCGCGGAAGCTTTTAGCGC<br>GTCGCCCAACCCT           | Used in conjunction with nfsA_EcoRI to clone <i>nfsA</i> into pQE-80L                                                             |
| sdm_NfsAR203A_Fwd                                                                | TTACCTCACCGCAGGCAGC<br>AATAATCGCC              | Used in conjunction with sdm_NfsA_R203A_Rev to substitute R203 to an A in pQE-80L- <i>nfsA</i> to generate pQE-80L- <i>nfsA</i> * |
| sdm_NfsA_R203A_Rev                                                               | TATTCCGCCAGTTGCTCG                             | Used in conjunction with sdm_NfsA_R203A_Fwd to substitute R203 to an A in pQE-80L- <i>nfsA</i> to generate pQE-80L- <i>nfsA</i> * |
| <b>Primers used in chromosomal perturbations</b>                                 |                                                |                                                                                                                                   |
| <b>Primer name</b>                                                               | <b>Sequence</b>                                | <b>Description</b>                                                                                                                |
| KanR_Rev                                                                         | ATGATGGATACTTTCTCGG<br>CAGGAG                  | Used in conjunction with gene external primer to confirm chromosomal location of kanamycin cassette                               |
| nfsA_Ext_Fwd                                                                     | ACTTTGCAGAGGGAAGCG<br>TA                       | Used in conjunction with KanR_Rev to confirm chromosomal location of kanamycin cassette                                           |
| nfsA_Ext_Rev                                                                     | CATGGAACGCAATTTGTCA<br>C                       | Used in conjunction with nfsA_Ext_Fwd to confirm excision of kan cassette                                                         |
| nfsA_Int_Fwd                                                                     | GTGTCGTTGATACGGCAAT<br>G                       | Used in conjunction with nfsA_Int_Rev to rule out gene duplication after deletion of <i>nfsA</i> gene                             |
| nfsA_Int_Rev                                                                     | CCAGCGGTTGATAGCTGTT<br>T                       | Used in conjunction with nfsA_Int_Fwd to rule out gene duplication after deletion of <i>nfsA</i> gene                             |
| nfsB_Ext_Fwd                                                                     | CCAGAGACCAGGTGGGAA<br>TA                       | Used in conjunction with nfsB_Ext_Rev to confirm excision of kan cassette                                                         |
| nfsB_Ext_Rev                                                                     | CCAAGCATTAAGCCAGGG<br>TA                       | Used in conjunction with KanR_Rev to confirm chromosomal location of kanamycin cassette                                           |

| <b>Primers used in chromosomal perturbations (continuation)</b> |                           |                                                                                                       |
|-----------------------------------------------------------------|---------------------------|-------------------------------------------------------------------------------------------------------|
| <b>Primer name</b>                                              | <b>Sequence</b>           | <b>Description</b>                                                                                    |
| nfsB_Int_Fwd                                                    | ACCTGTTTTGCCATCCACT<br>C  | Used in conjunction with nfsB_Int_Rev to rule out gene duplication after deletion of <i>nfsB</i> gene |
| nfsB_Int_Rev                                                    | GCTGCCGGTAATTACGTGT<br>T  | Used in conjunction with nfsB_Int_Fwd to rule out gene duplication after deletion of <i>nfsB</i> gene |
| glk_Ext_Rev                                                     | AGGGGTGAATCCTGGGCT<br>AT  | Used in conjunction with KanR_Rev to confirm chromosomal location of kanamycin cassette               |
| glk_Int_Fwd                                                     | TAAATGTGCACCGGAACC<br>GA  | Used in conjunction with glk_Int_Rev to rule out gene duplication after deletion of <i>glk</i> gene   |
| glk_Int_Rev                                                     | GCAGAACCGGTCGAAGGT<br>AA  | Used in conjunction with glk_Int_Fwd to rule out gene duplication after deletion of <i>glk</i> gene   |
| ptsI_Ext_Fwd                                                    | AGACGAGCAGAAAGCGGT<br>TG  | Used in conjunction with KanR_Rev to confirm chromosomal location of kanamycin cassette               |
| ptsI_Int_Fwd                                                    | ATTCAGGCATTTTAGCAT<br>CC  | Used in conjunction with ptsI_Int_Rev to rule out gene duplication after deletion of <i>ptsI</i> gene |
| ptsI_Int_Rev                                                    | GATCGCGCAGGATCTCTCT<br>A  | Used in conjunction with ptsI_Int_Fwd to rule out gene duplication after deletion of <i>ptsI</i> gene |
| <b>Primers used to sequence <i>nfsA/nfsA*</i> in pQE-80L</b>    |                           |                                                                                                       |
| <b>Primer name</b>                                              | <b>Sequence</b>           | <b>Description</b>                                                                                    |
| pQE-80L_Seq_Fwd                                                 | TATTTGCTTTGTGAGCGGA<br>TA | For sequencing of cloned <i>nfsA/nfsA*</i> into pQE-80L                                               |
| pQE-80L_Seq_Rev                                                 | CTGAAAATCTCGCCAAGCT<br>A  | For sequencing of cloned <i>nfsA/nfsA*</i> into pQE-80L                                               |

**Supplementary Table 3. Artificial Urine Recipe**

|                                                                                        | MW (g/mol) | Molarity (mM)/ | Quantity (g) for 1 L |
|----------------------------------------------------------------------------------------|------------|----------------|----------------------|
| CH <sub>4</sub> N <sub>2</sub> O Urea                                                  | 60.06      | 170            | 10.21                |
| C <sub>5</sub> H <sub>4</sub> N <sub>4</sub> O <sub>3</sub> Uric acid                  | 168.11     | 0.4            | 0.067                |
| C <sub>4</sub> H <sub>7</sub> N <sub>3</sub> O Creatinine                              | 113.12     | 7              | 0.79                 |
| C <sub>6</sub> H <sub>8</sub> O <sub>7</sub> .H <sub>2</sub> O Citric Acid monohydrate | 210.15     | 2              | 0.42                 |
| NaCl                                                                                   | 58.44      | 90             | 5.26                 |
| NH <sub>4</sub> Cl                                                                     | 53.491     | 25             | 1.34                 |
| CaCl <sub>2</sub> .2H <sub>2</sub> O                                                   | 147.02     | 2.5            | 0.37                 |
| MgSO <sub>4</sub> .7H <sub>2</sub> O                                                   | 246.48     | 2              | 0.49                 |
| NaHCO <sub>3</sub>                                                                     | 84.01      | 25             | 2.10                 |
| Na <sub>2</sub> SO <sub>4</sub> .10H <sub>2</sub> O                                    | 322.2      | 10             | 3.22                 |
| KH <sub>2</sub> PO <sub>4</sub>                                                        | 136.09     | 7              | 0.95                 |
| K <sub>2</sub> HPO <sub>4</sub>                                                        | 174.18     | 7              | 1.22                 |
| FeSO <sub>4</sub> . 7H <sub>2</sub> O                                                  | 278.01     | 0.005          | 0.0014               |
| (90%) DL-Lactic acid                                                                   | 90.08      | 1.1            | 0.11                 |
| Peptone                                                                                |            | -              | 1.00                 |
| Yeast extract                                                                          |            | -              | 0.005                |

Peptone, yeast extract, NaCl, Na<sub>2</sub>SO<sub>4</sub>.10H<sub>2</sub>O, KH<sub>2</sub>PO<sub>4</sub>, K<sub>2</sub>HPO<sub>4</sub> were dissolved in about 700 mL ddH<sub>2</sub>O and autoclaved. Afterwards, the remainder of the components were added, and the pH was adjusted to 6.0 and final volume to 1 L. The final solution was then sterilized by filtering with a 0.22 µm filter.

## References

1. Kohanski MA, Dwyer DJ, Hayete B, Lawrence CA, Collins JJ. 2007. A common mechanism of cellular death induced by bactericidal antibiotics. *Cell* 130:797-810.
2. Baba T, Ara T, Hasegawa M, Takai Y, Okumura Y, Baba M, Datsenko KA, Tomita M, Wanner BL, Mori H. 2006. Construction of *Escherichia coli* K-12 in-frame, single-gene knockout mutants: the Keio collection. *Mol Syst Biol* 2:2006 0008.
3. Datsenko KA, Wanner BL. 2000. One-step inactivation of chromosomal genes in *Escherichia coli* K-12 using PCR products. *Proc Natl Acad Sci U S A* 97:6640-5.
4. Mulvey MA, Schilling JD, Hultgren SJ. 2001. Establishment of a persistent *Escherichia coli* reservoir during the acute phase of a bladder infection. *Infect Immun* 69:4572-9.
5. Chen SL, Hung CS, Xu J, Reigstad CS, Magrini V, Sabo A, Blasiar D, Bieri T, Meyer RR, Ozersky P, Armstrong JR, Fulton RS, Latreille JP, Spieth J, Hooton TM, Mardis ER, Hultgren SJ, Gordon JI. 2006. Identification of genes subject to positive selection in uropathogenic strains of *Escherichia coli*: a comparative genomics approach. *Proc Natl Acad Sci U S A* 103:5977-82.
6. Ruiz N, Falcone B, Kahne D, Silhavy TJ. 2005. Chemical conditionality: a genetic strategy to probe organelle assembly. *Cell* 121:307-17.
7. Orman MA, Brynildsen MP. 2015. Inhibition of stationary phase respiration impairs persister formation in *E. coli*. *Nat Commun* 6:7983.
